# Supplementary material for: Atrial fibrillation in patients with an atrial septal defect in a single centre cohort during a long clinical follow-up: its association with closure and outcome of therapy
Source: PubMed Central journal article supplement — Open Heart. 2020 Aug 17;7(2):e001298. doi: 10.1136/openhrt-2020-001298 (PMC7437693; doi:10.1136/openhrt-2020-001298), 2020-08-17
Supplement: openhrt-2020-001298supp001.pdf [file openhrt-2020-001298supp001.pdf]

**Supplements Table 1**

|                                | <b>All patients<br/>N = 173</b> | <b>Closed<br/>N = 126</b> | <b>Unclosed<br/>N = 47</b> | <b>P Value</b> |
|--------------------------------|---------------------------------|---------------------------|----------------------------|----------------|
| Age*                           | 33 (17-49)                      | 31 (16-45)                | 43 (26-64)                 | .001           |
| Female                         | 120 (69.4%)                     | 89 (70.6%)                | 31 (66.0%)                 | .553           |
| Hypertension                   | 46 (26.6%)                      | 30 (23.8%)                | 16 (34.0%)                 | .175           |
| Diabetes mellitus              | 10 (5.8%)                       | 7 (5.6%)                  | 3 (6.4%)                   | .836           |
| Obstructive sleep apnoea       | 8 (4.6%)                        | 6 (4.8%)                  | 2 (4.3%)                   | .888           |
| Left atrial dilatation         | 64 (37.0%)                      | 44 (34.9%)                | 20 (42.6%)                 | .355           |
| AF                             | 34 (19.7%)                      | 22 (17.5%)                | 12 (25.5%)                 | .235           |
| Age at onset AF (n = 34)       |                                 | 55 (45-66)                | 66 (60-75)                 | .020           |
| Age at onset AF < 40y (n = 34) |                                 | 5 (22.7%)                 | 1 (8.3%)                   | .389           |

Values expressed as n (%) or as median (interquartile range).

\* Age at opening of the database (01.01.2004)

AF = atrial fibrillation
