# Supplementary material for: Atrial fibrillation in patients with an atrial septal defect in a single centre cohort during a long clinical follow-up: its association with closure and outcome of therapy
Source: PubMed Central journal article supplement — Open Heart. 2020 Aug 17;7(2):e001298. doi: 10.1136/openhrt-2020-001298 (PMC7437693; doi:10.1136/openhrt-2020-001298), 2020-08-17
Supplement: openhrt-2020-001298supp002.pdf [file openhrt-2020-001298supp002.pdf]

**Supplements Table 2**

|                      | <b>All patients<br/>N = 173</b> | <b>Closed<br/>N = 126</b> | <b>Unclosed<br/>N = 47</b> |
|----------------------|---------------------------------|---------------------------|----------------------------|
| CVA/TIA              | 10 (5,8%)                       | 5 (4%)                    | 5 (10,6%)                  |
| Oral anticoagulation | 34 (19,7%)                      | 19 (15,1%)                | 15 (21,2%)                 |
| Platelet inhibition  | 19 (11%)                        | 13 (10.3%)                | 6 (12.8%)                  |

Values expressed as n (%) or as median (interquartile range).

CVA = cerebrovascular accident

TIA = Transient ischemic attack

AF = atrial fibrillation
